# Supplementary material
Source: PubMed Central journal article supplement (PMC8344805)

# Figure S1

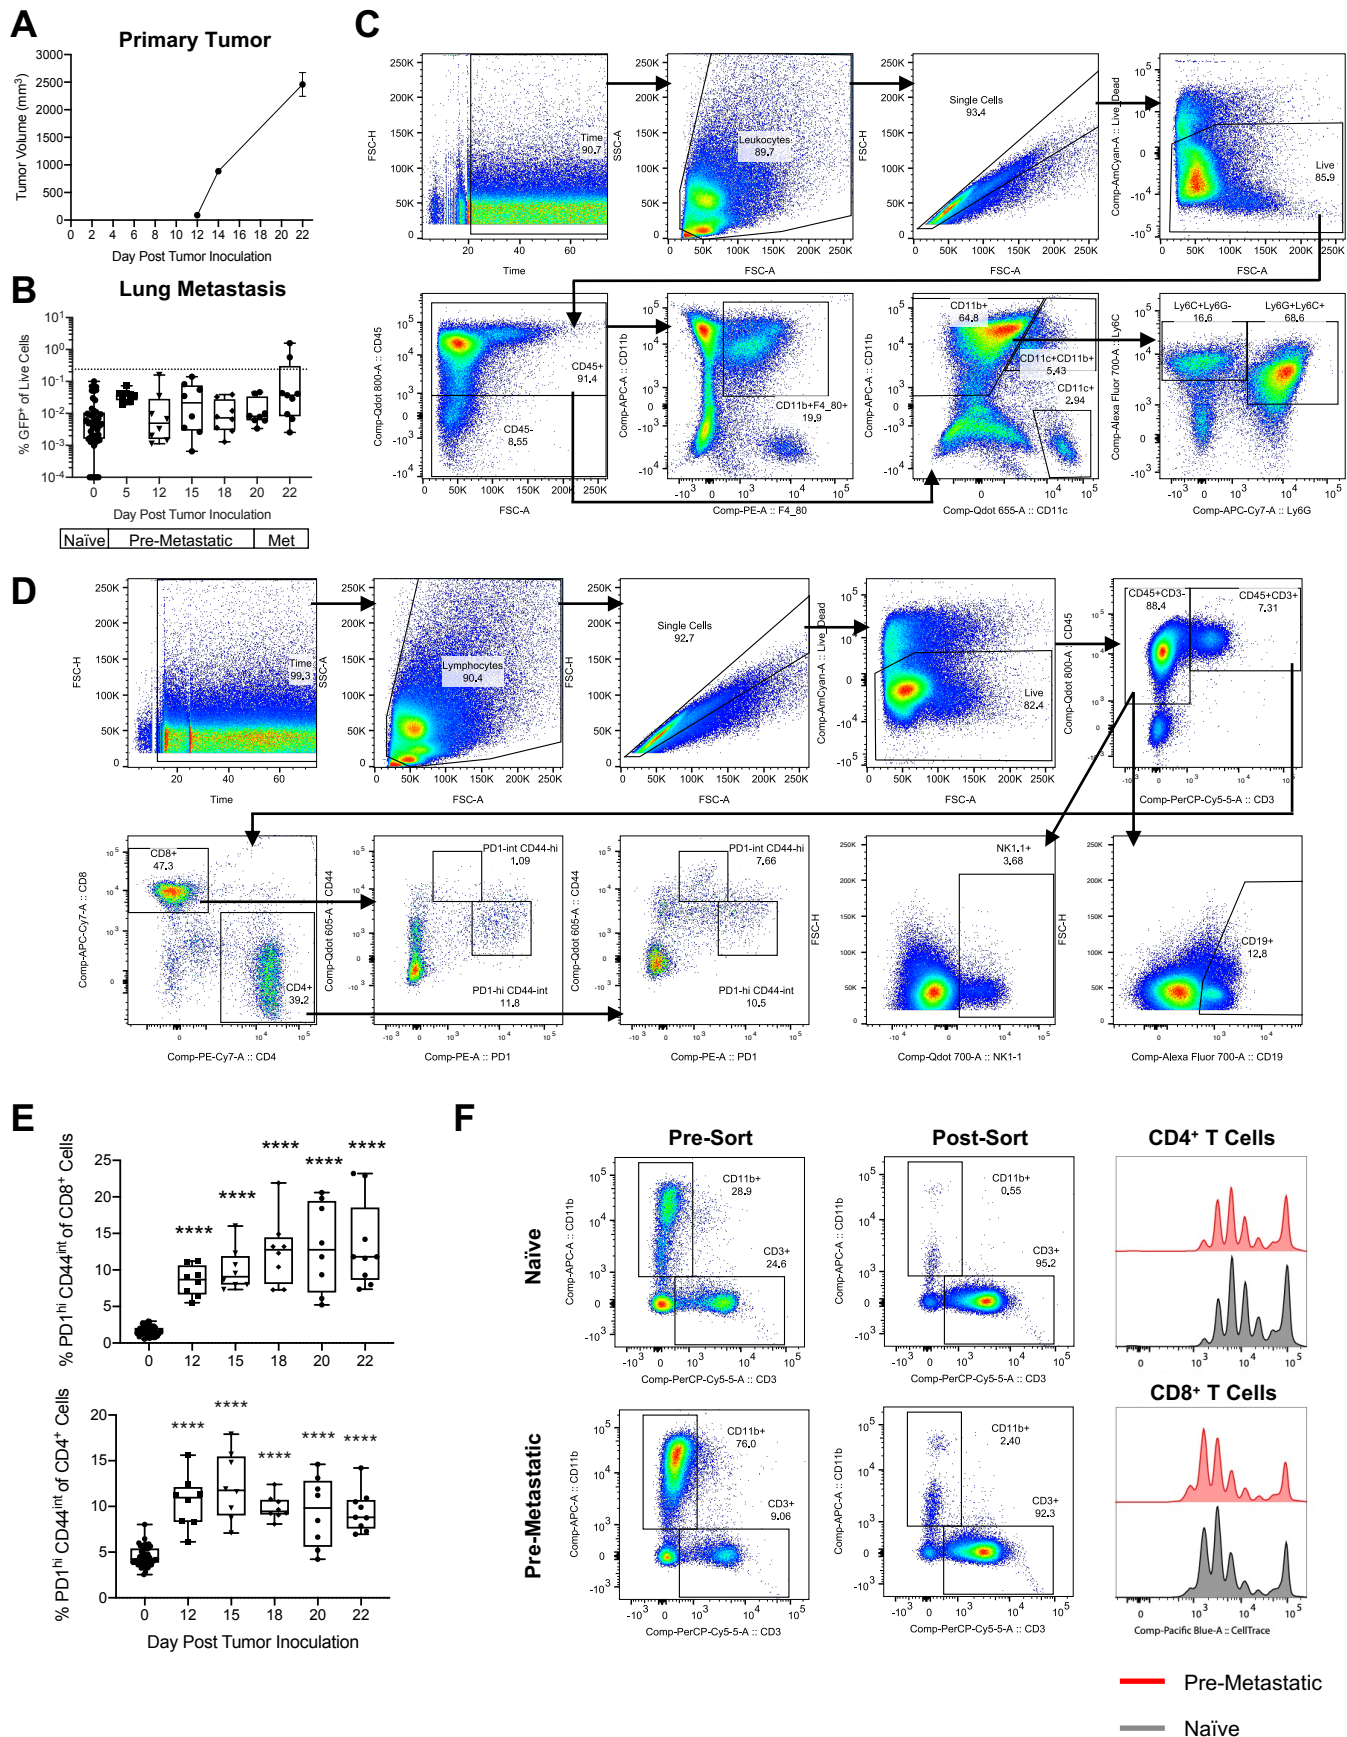

Supplement: NIHMS1677914-supplement-Supp_Fig1.pdf [file NIHMS1677914-supplement-Supp_Fig1.pdf]

**Figure S2**

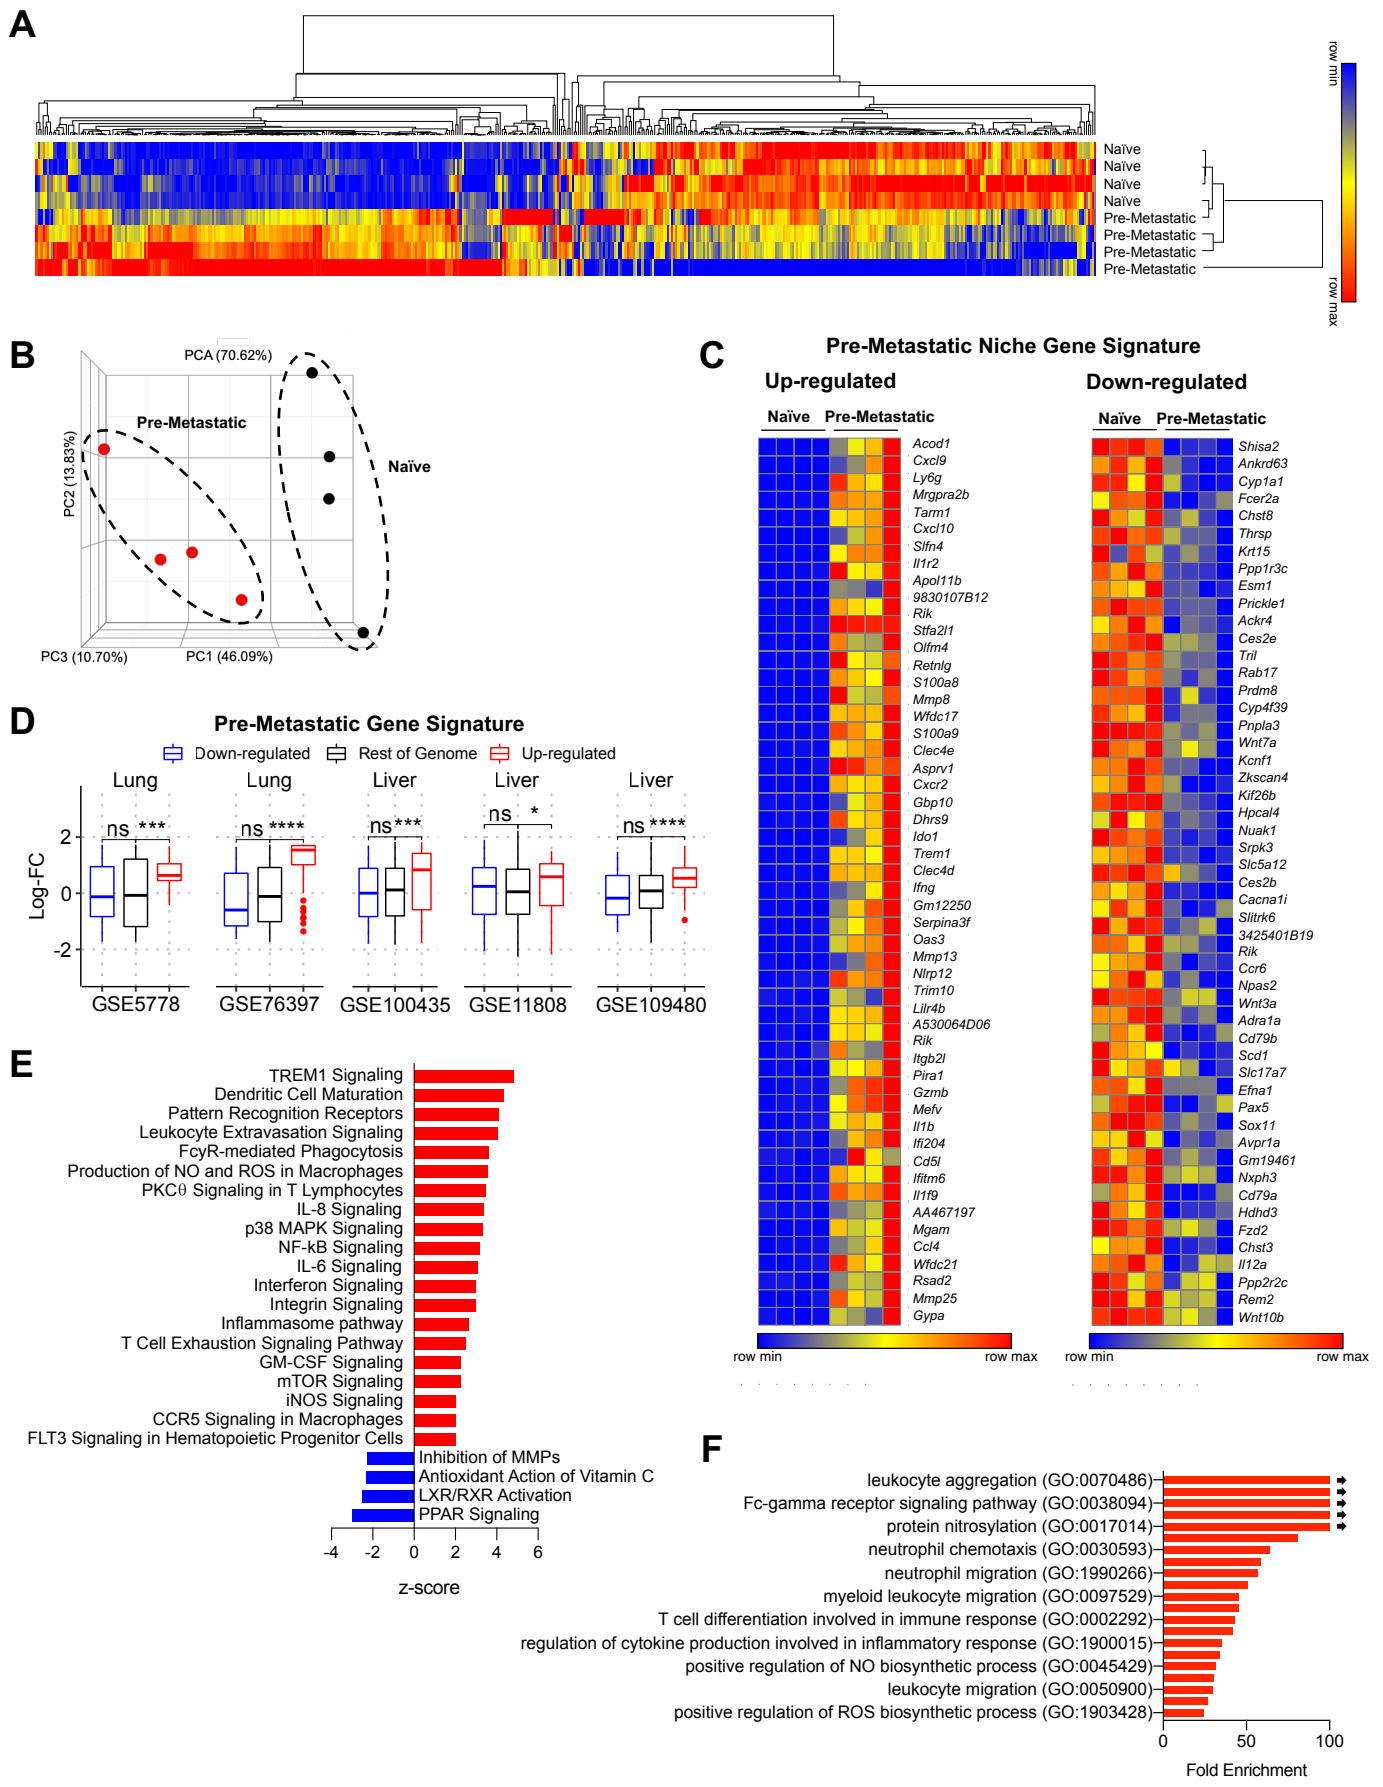

Supplement: NIHMS1677914-supplement-Supp_Fig2.pdf [file NIHMS1677914-supplement-Supp_Fig2.pdf]

**Figure S3**

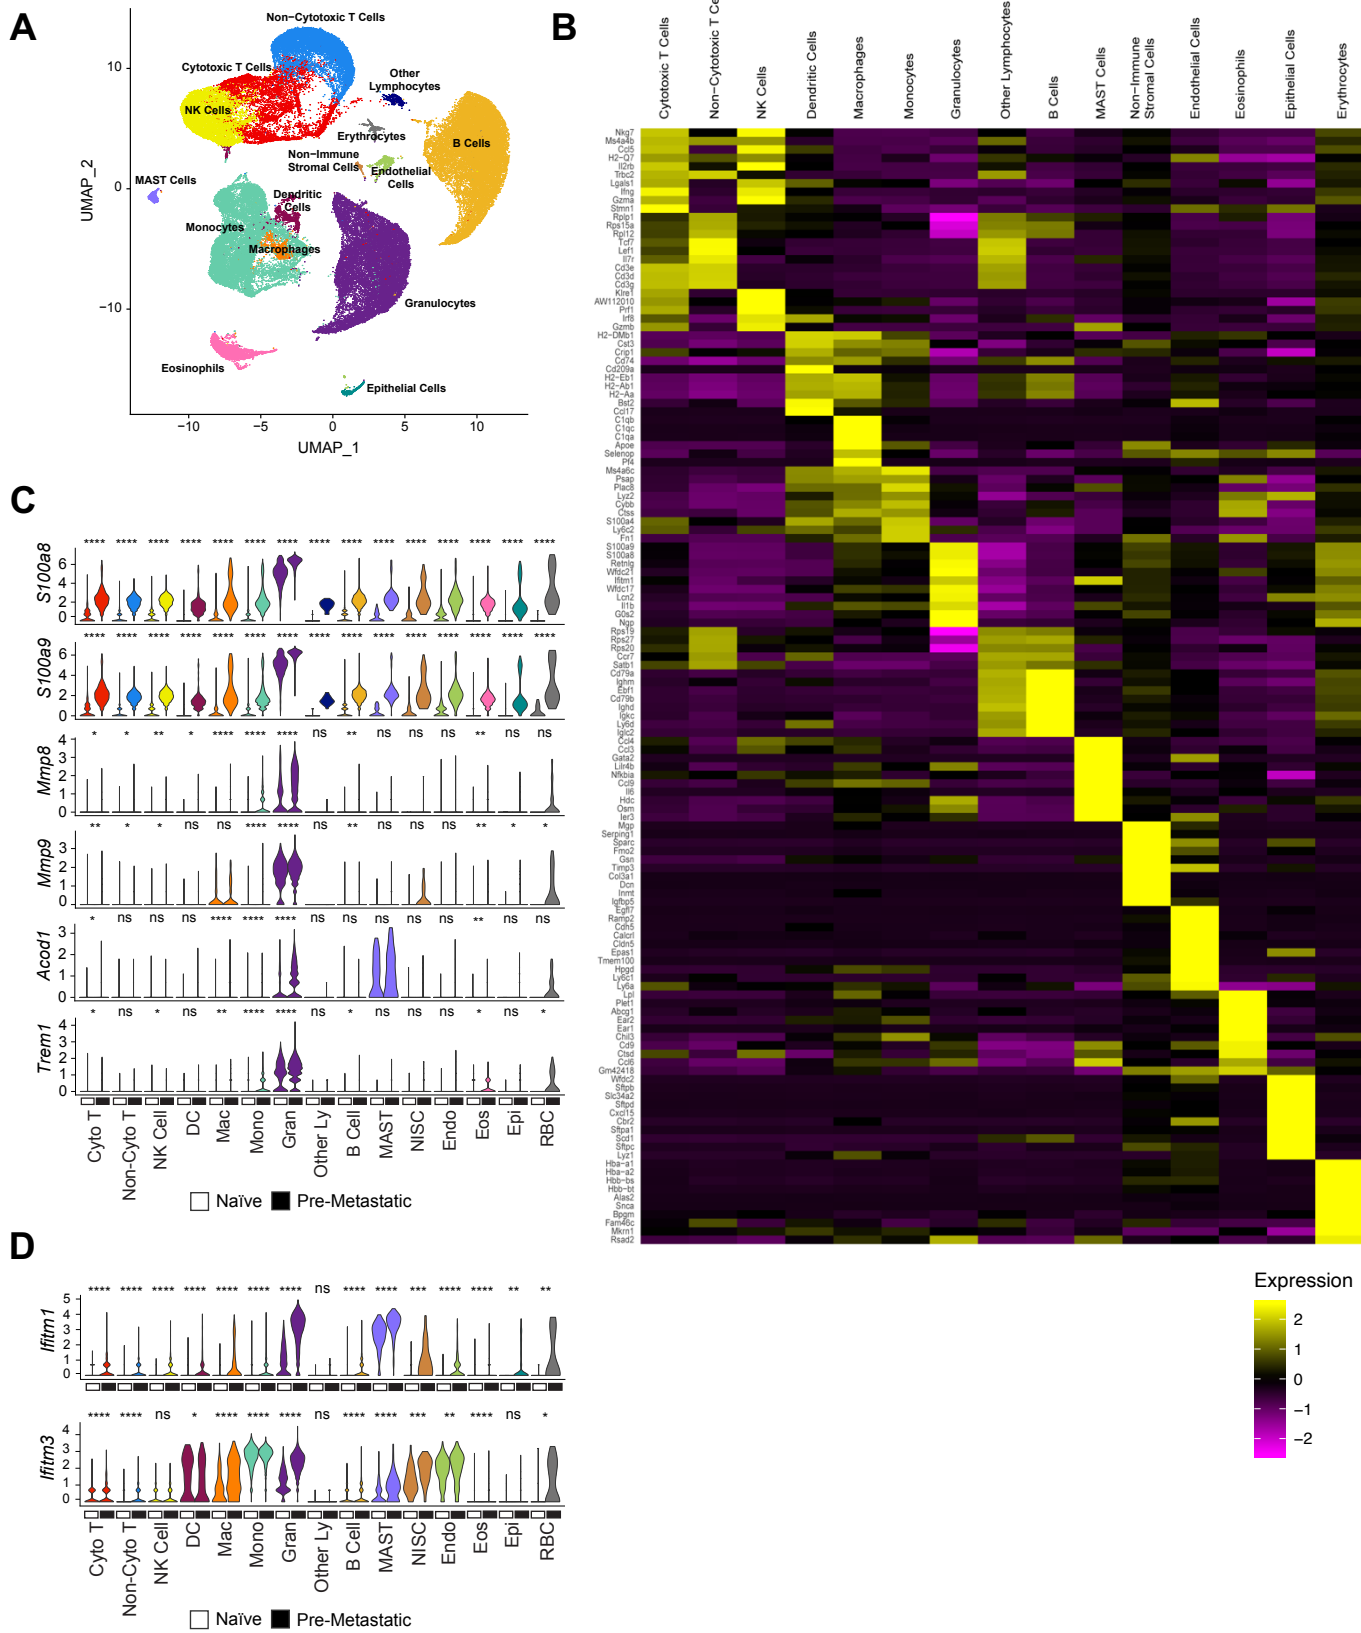

Supplement: NIHMS1677914-supplement-Supp_Fig3.pdf [file NIHMS1677914-supplement-Supp_Fig3.pdf]

**Figure S4**

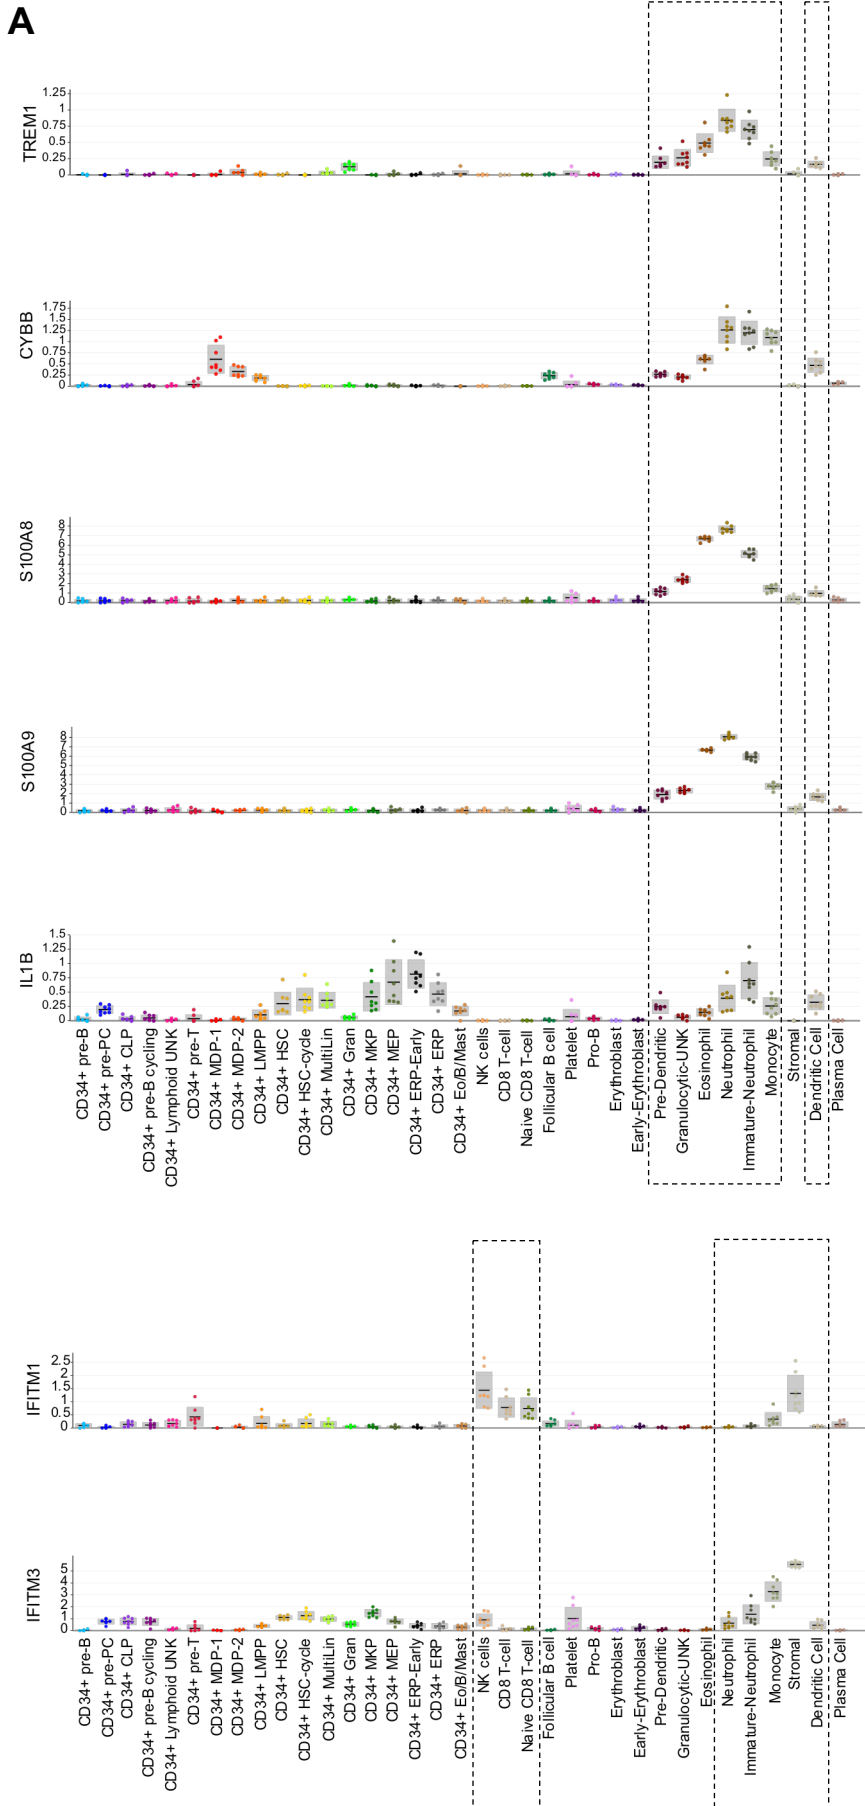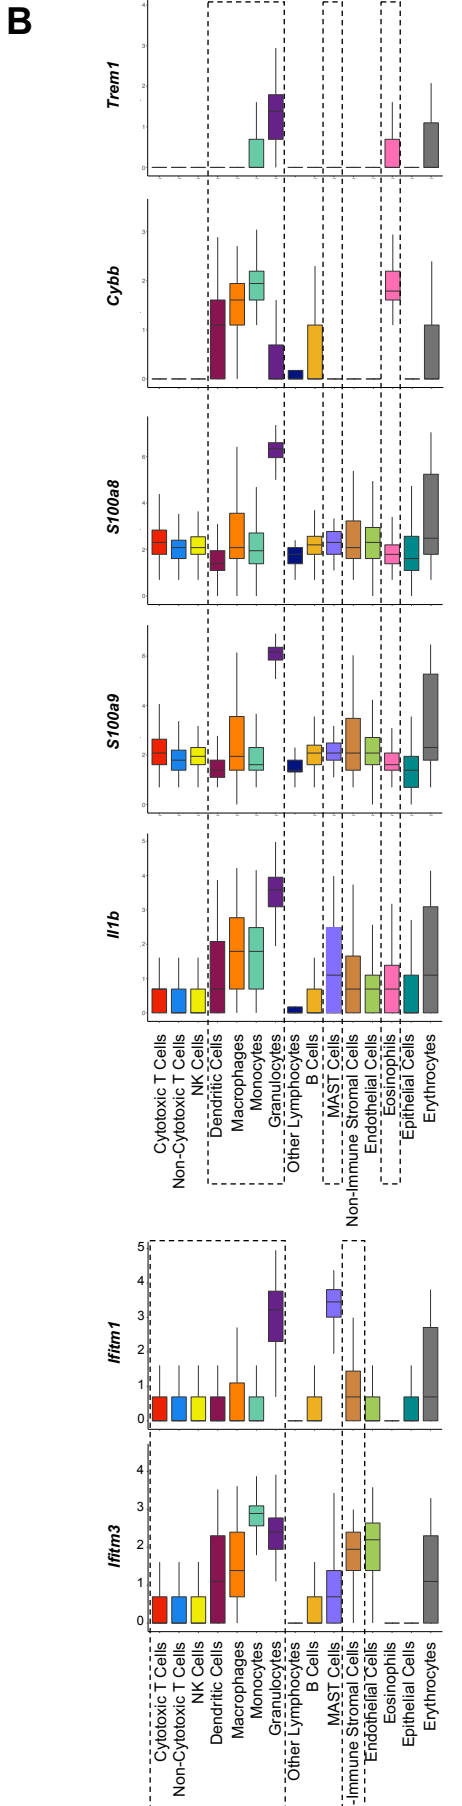

Supplement: NIHMS1677914-supplement-Supp_Fig4.pdf [file NIHMS1677914-supplement-Supp_Fig4.pdf]

# Figure S5

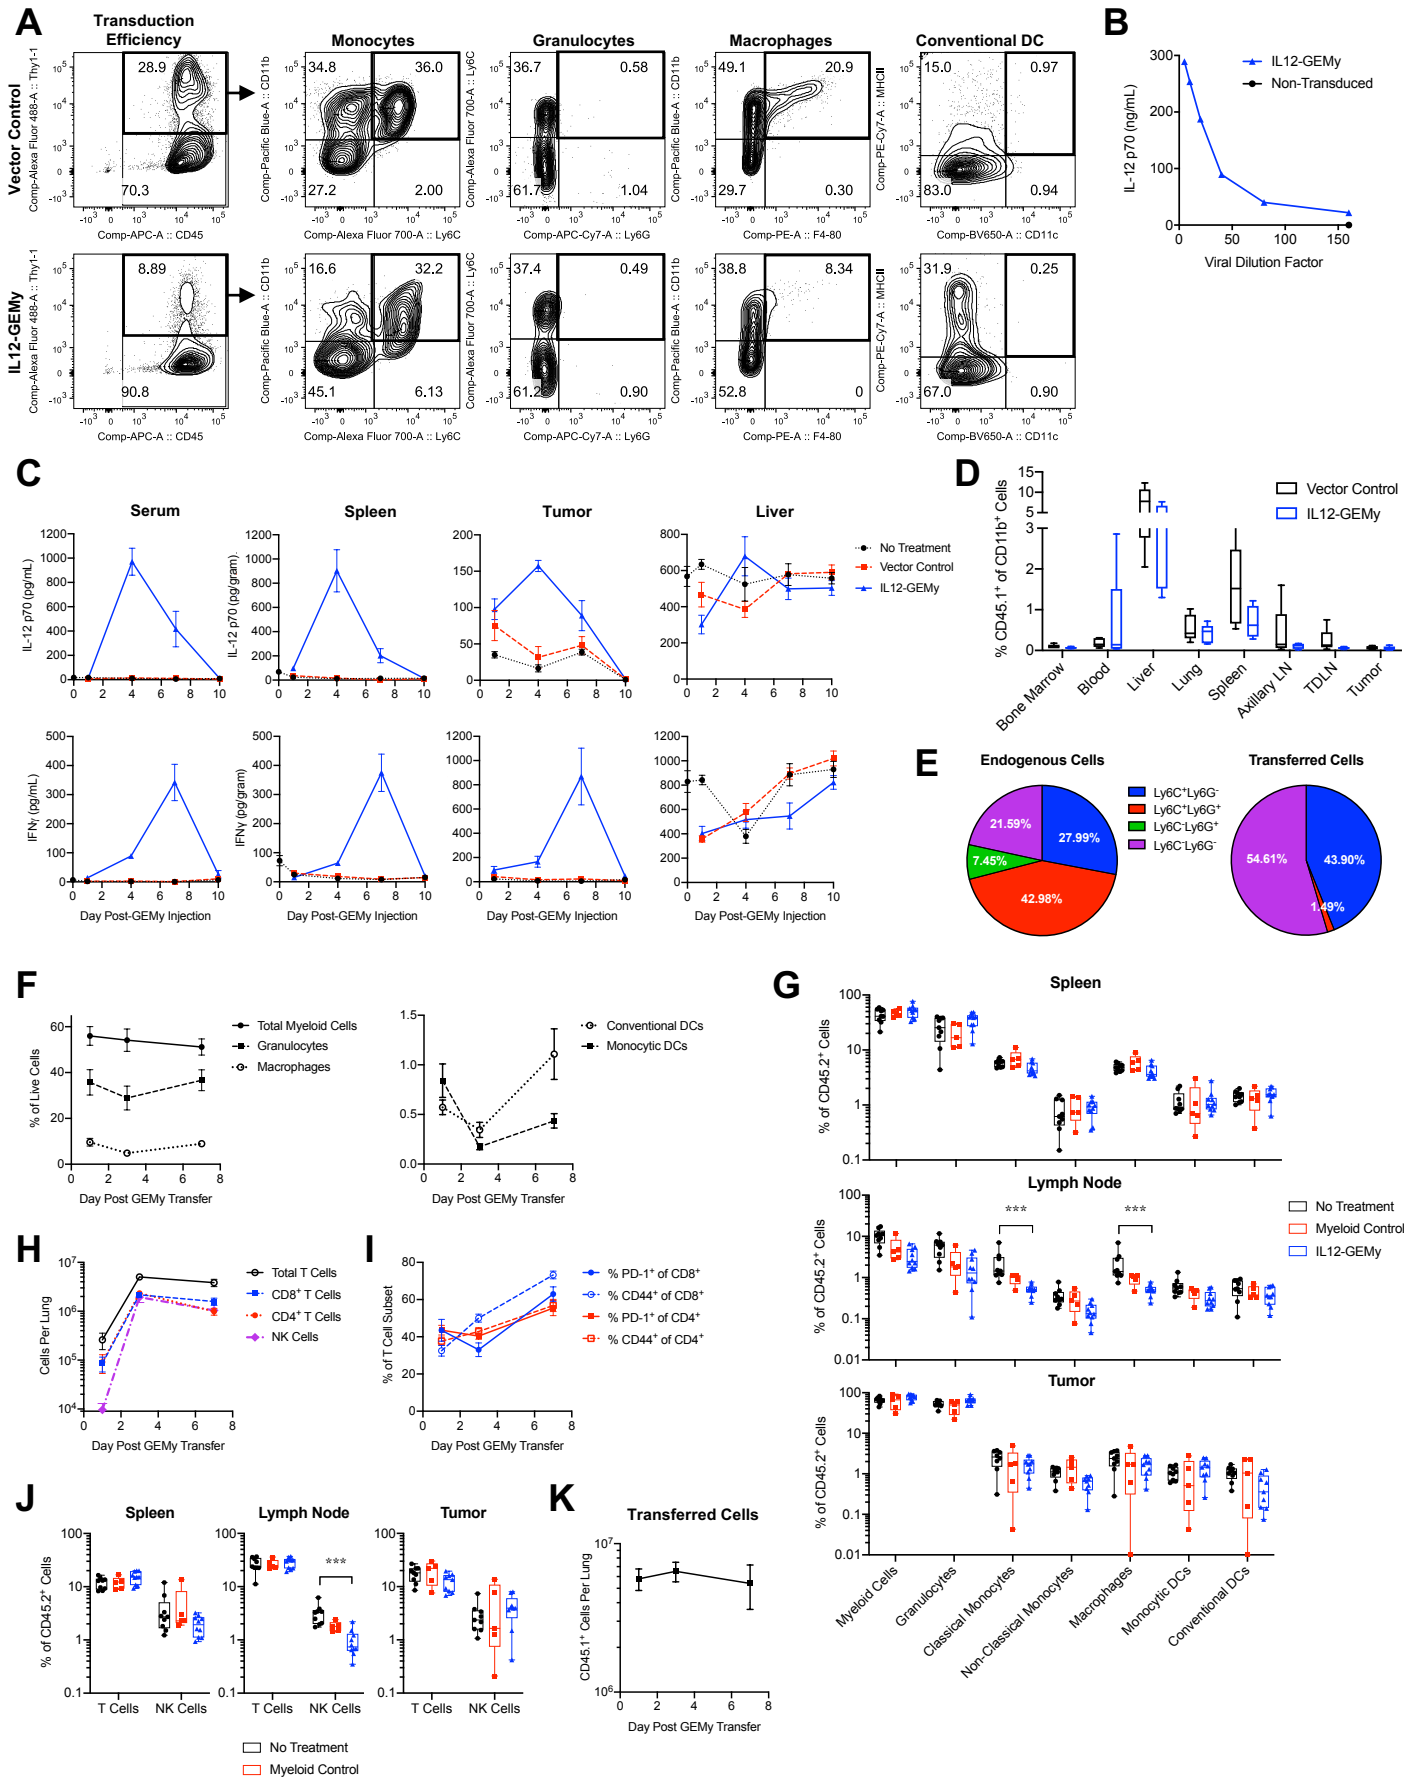

Supplement: NIHMS1677914-supplement-Supp_Fig5.pdf [file NIHMS1677914-supplement-Supp_Fig5.pdf]

**Figure S6**

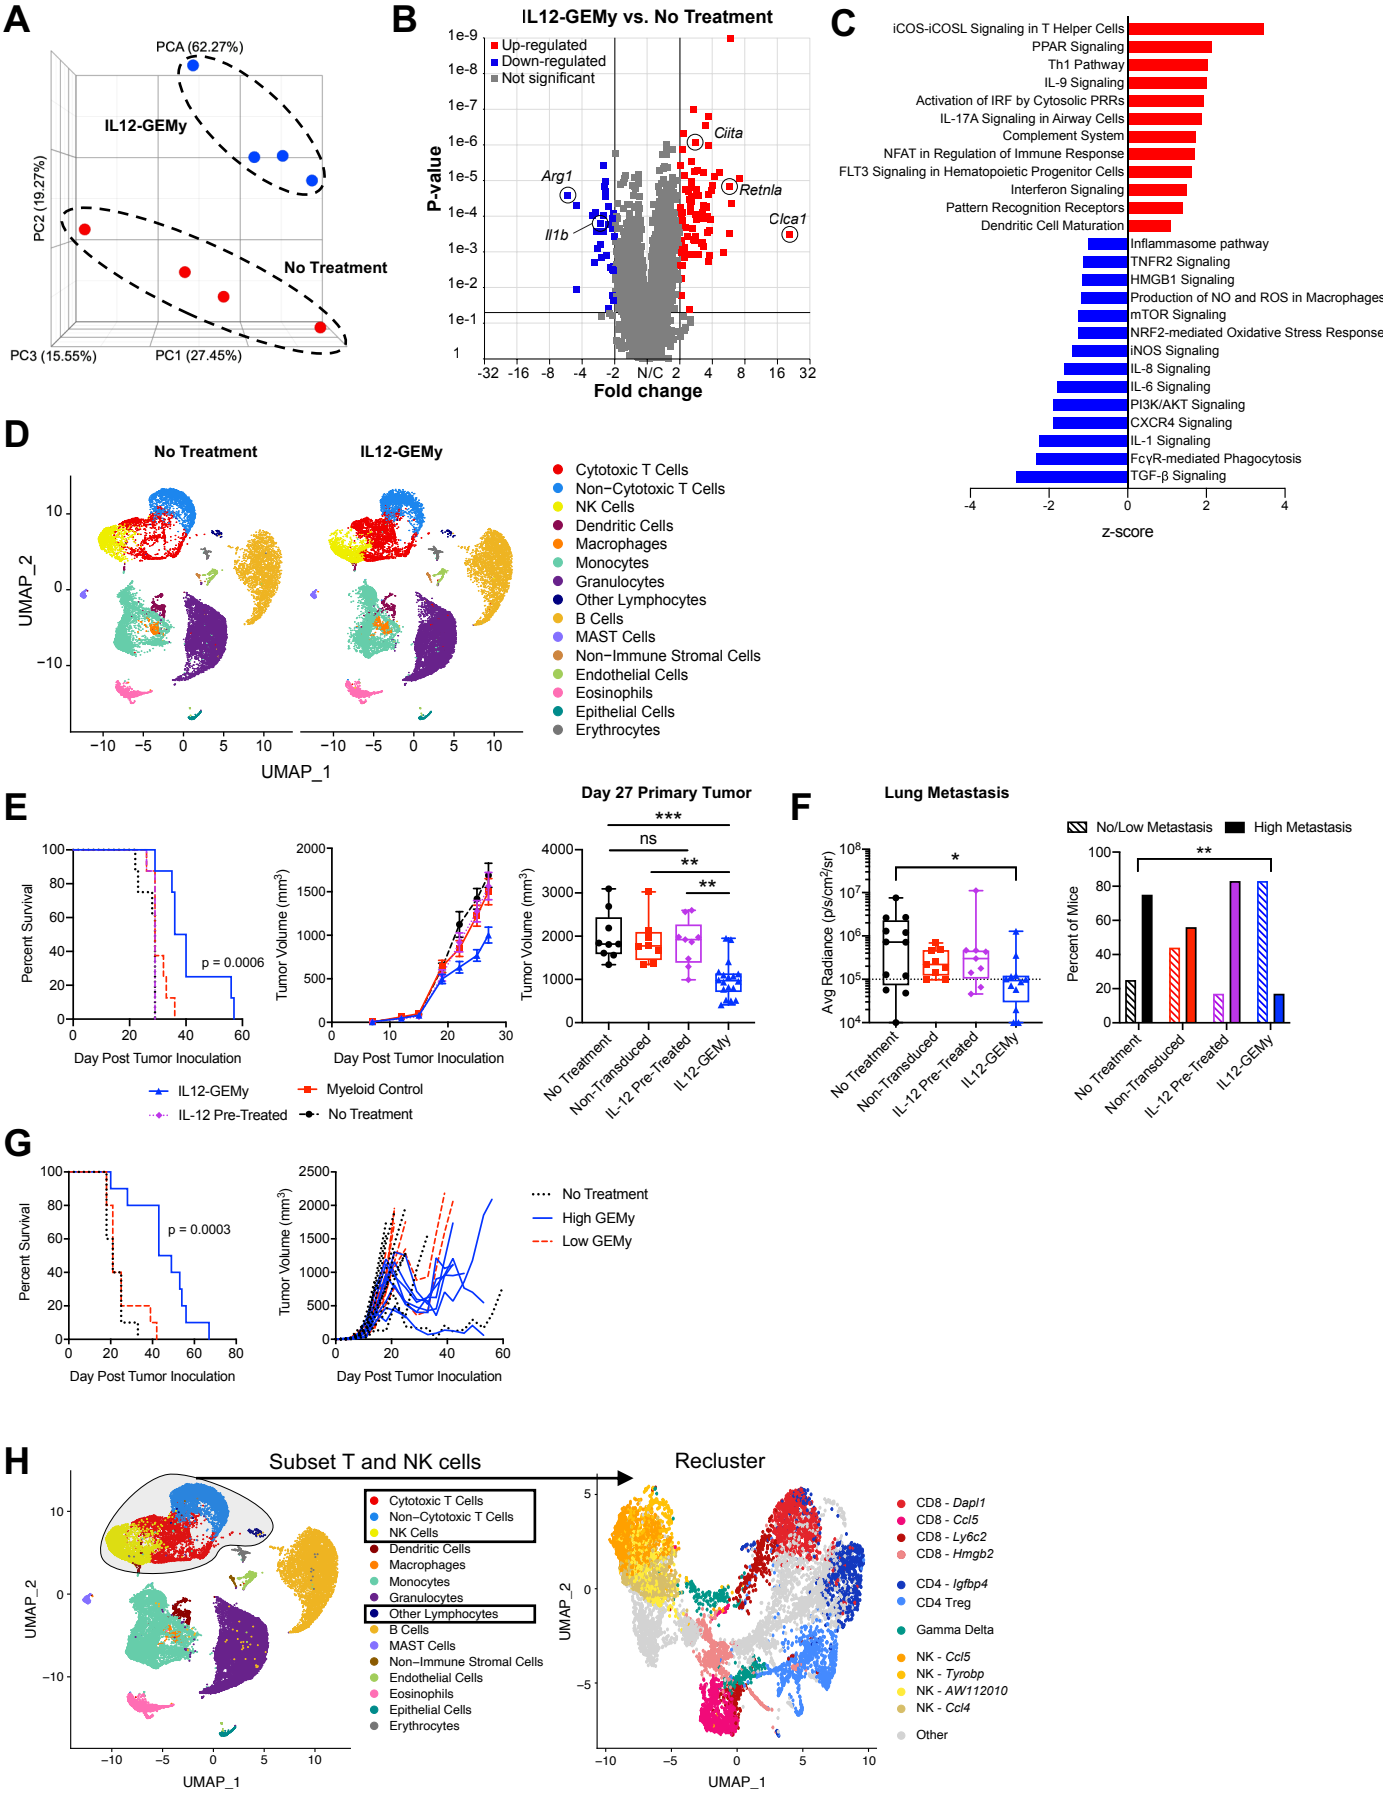

Supplement: NIHMS1677914-supplement-Supp_Fig6.pdf [file NIHMS1677914-supplement-Supp_Fig6.pdf]

# Figure S7

## A

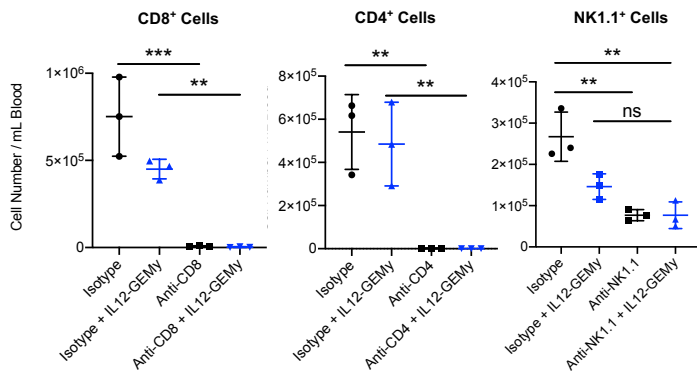

## B

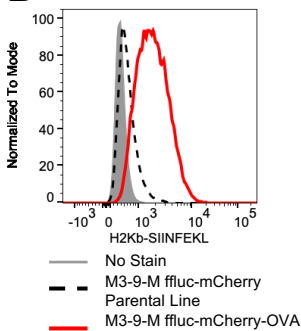

## C

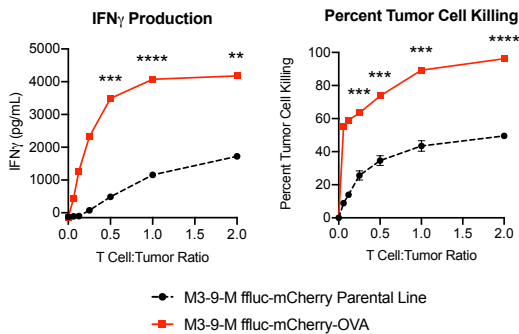

## D

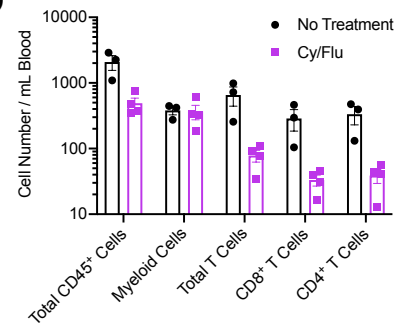

## E

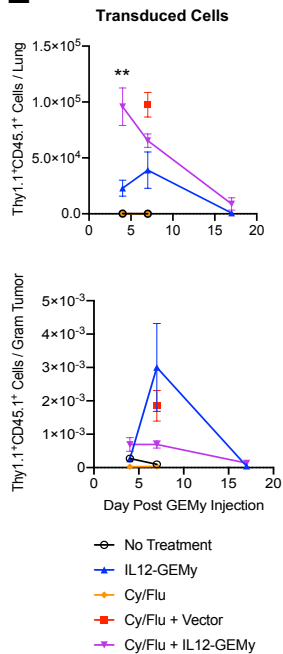

## F

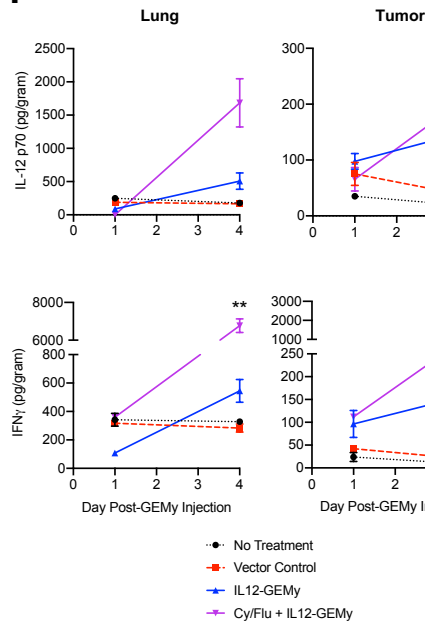

## G

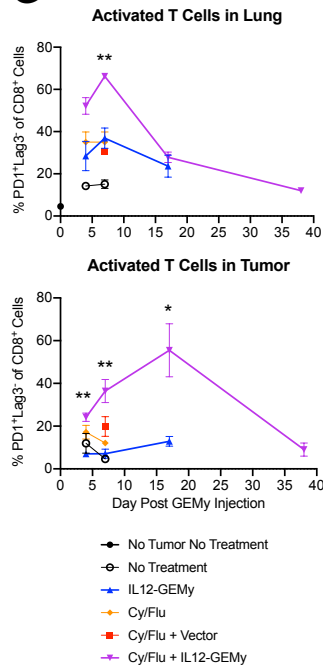

## H

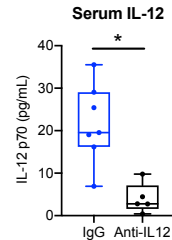

Supplement: NIHMS1677914-supplement-Supp_Fig7.pdf [file NIHMS1677914-supplement-Supp_Fig7.pdf]
